# Supplementary material for: High-resolution global map of smallholder and industrial closed-canopy oil palm plantations
Source: Copernicus journal article supplement (doi:10.5194/essd-2020-159), 2020-08-24
Supplement: Supplementary file 1 [file essd-2020-159-supplement.pdf]

## SUPPLEMENTARY MATERIALS

**S**Table 1. Range of climate values in industrial plantations. These ranges represent the minimum and the maximum values of the Worldclim bioclimatic variables observed in the industrial oil palm plantations of the IUCN layer.

| <b>bioVariables</b>                    | <b>minValues</b> | <b>maxValues</b> | <b>Units</b>       |
|----------------------------------------|------------------|------------------|--------------------|
| Annual mean temperature                | 18.50            | 28.90            | °C                 |
| Mean diurnal range                     | 6.00             | 14.50            | °C                 |
| Isothermality                          | 57.00            | 95.00            | %                  |
| Temperature seasonality                | 1.19             | 22.19            | °C                 |
| Max temperature of warmest month       | 24.10            | 36.50            | °C                 |
| Min temperature of coldest month       | 12.90            | 24.20            | °C                 |
| Temperature annual range (bio05-bio06) | 7.10             | 18.30            | °C                 |
| Mean temperature of wettest quarter    | 18.70            | 29.00            | °C                 |
| Mean temperature of driest quarter     | 18.30            | 29.00            | °C                 |
| Mean temperature of warmest quarter    | 18.90            | 29.60            | °C                 |
| Mean temperature of coldest quarter    | 18.20            | 28.10            | °C                 |
| Annual precipitation                   | 987.00           | 5032.00          | mm                 |
| Precipitation of wettest month         | 134.00           | 831.00           | mm                 |
| Precipitation of driest month          | 1.00             | 274.00           | mm                 |
| Precipitation seasonality              | 9.00             | 101.00           | Coef. of variation |
| Precipitation of wettest quarter       | 386.00           | 2069.00          | mm                 |
| Precipitation of driest quarter        | 7.00             | 911.00           | mm                 |
| Precipitation of warmest quarter       | 107.00           | 1795.00          | mm                 |
| Precipitation of coldest quarter       | 8.00             | 1955.00          | mm                 |

**S**Table 2. List of countries where we confirmed the presence of oil palm plantations with the global oil palm layer for the second half year of 2019.

| Central America    | South America | Western Africa | Central Africa       | SE Asia     | Pacific          |
|--------------------|---------------|----------------|----------------------|-------------|------------------|
| Dominican Republic | Ecuador       | Togo           | Angola               | Indonesia   | Papua New Guinea |
| Mexico             | Venezuela     | Ghana          | Burundi              | Singapore   | Solomon Is       |
| El Salvador        | Colombia      | Cote d'Ivoire  | Rwanda               | Brunei      | Vanuatu          |
| Guatemala          | Peru          | Guinea         | Uganda               | Philippines |                  |
| Panama             | Brazil        | Guinea-Bissau  | Tanzania             | Malaysia    |                  |
| Costa Rica         |               | Sierra Leone   | Cameroon             | Thailand    |                  |
| Nicaragua          |               | Liberia        | Equatorial Guinea    | Burma       |                  |
| Honduras           |               | Benin          | Sao Tome & Principe  | Cambodia    |                  |
| Belize             |               | Nigeria        | Gabon                | Vietnam     |                  |
|                    |               |                | Rep of the Congo     |             |                  |
|                    |               |                | Central African Rep  |             |                  |
|                    |               |                | Dem Rep of the Congo |             |                  |

10

**S**Table 3. Confusion matrix of the global oil palm layer (second half year of 2019) validated with 13,252 points.

|             | Other | Industrial | Smallholder |
|-------------|-------|------------|-------------|
| Other       | 11955 | 66         | 37          |
| Industrial  | 112   | 682        | 71          |
| Smallholder | 36    | 15         | 304         |

15

**S**Table 4. Comparison of the classification image obtained with the convolutional neural network (CNN) and the classification image presented in Xu et al., 2020 for 2016. In order to compare both methodologies, we applied the CNN to Sentinel-1 and 2 composites of the second half of 2016, which corresponds to the last year of the multi-anual analysis in Xu's data set. We used 5,199 points randomly distributed in the study area, which covers Malaysia, Sumatra, and Borneo.

|                          | Global OP year 2016 (SE Asia) | Chen, 2020 (2016) |
|--------------------------|-------------------------------|-------------------|
| <b>OA (%)</b>            | 96.6                          | 92.2              |
| <b>kappa</b>             | 77.4                          | 61.2              |
| <b>UA (%)</b>            |                               |                   |
| Other                    | 96.6                          | 97.4              |
| Industrial + smallholder | 96.6                          | 57.4              |
| <b>PA (%)</b>            |                               |                   |
| Other                    | 99.7                          | 94.0              |
| Industrial + smallholder | 67.1                          | 76.3              |

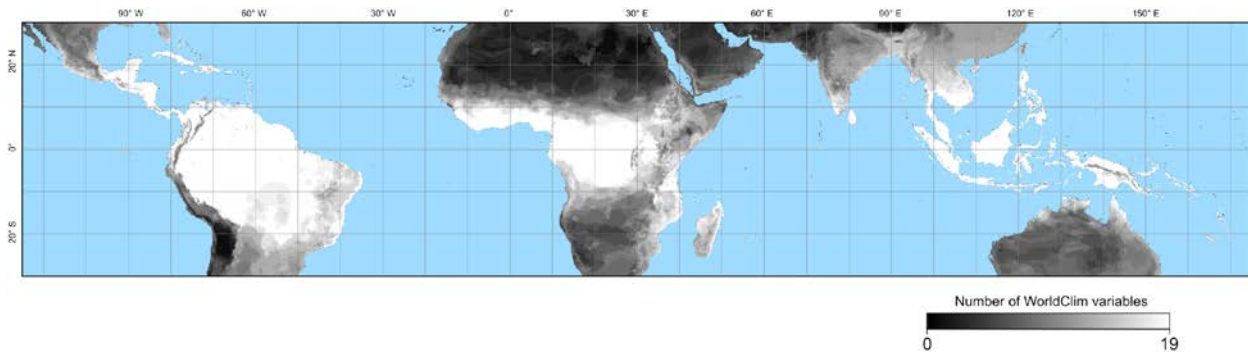

20

**SFigure 1. Potential area for oil palm growth. The map reflects the number of WorldClim bioclimatic variables that fall within the range observed in the industrial oil palm plantations (IUCN layer).**

25

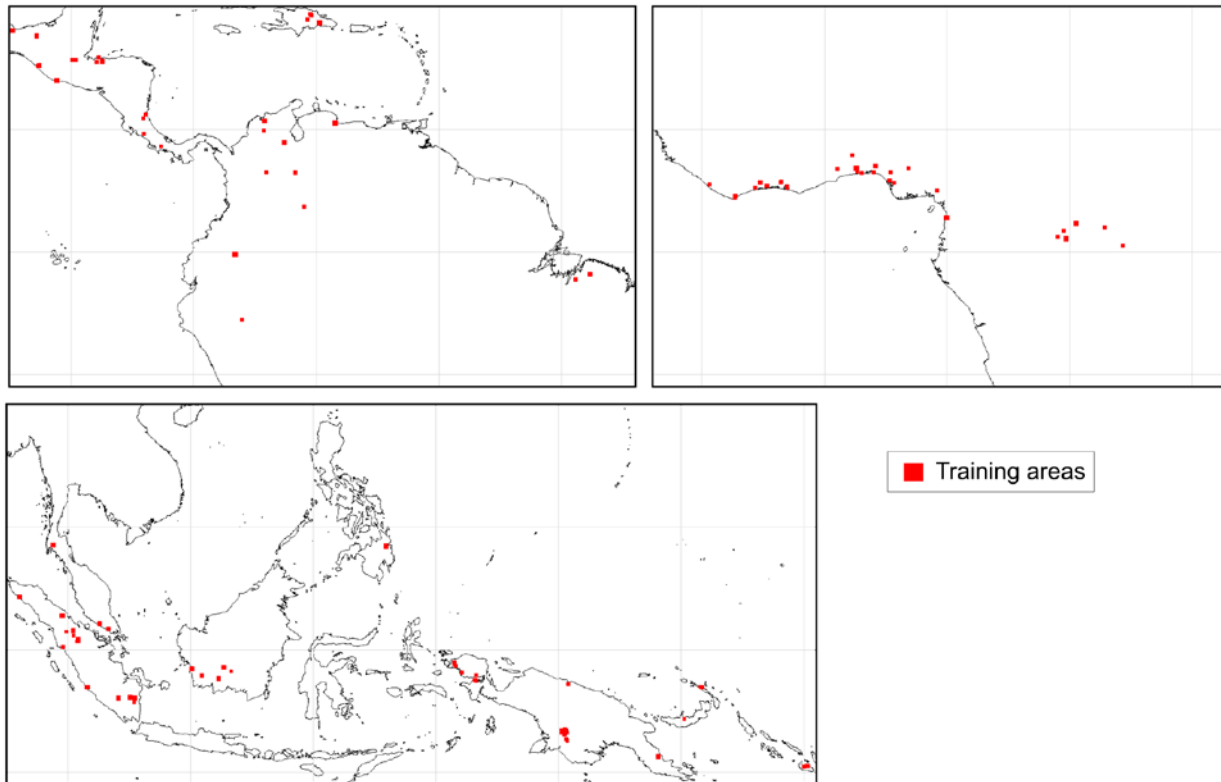

**SFigure 2. Location of areas where Sentinel-1 and 2 was collected for training the convolutional neural network.**

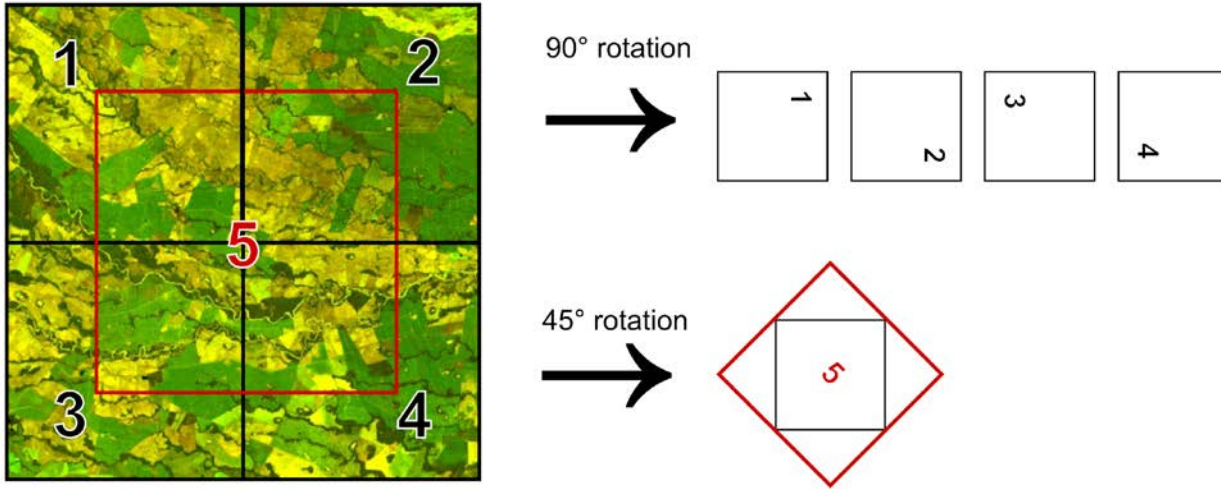

35 **Figure 3.** Data augmentation used in the training data. Sentinel-1 and 2 were labelled in images of size 1000 x 1000 pixels. These training images were rotated 90° clockwise to increase the size and quality of the training data set. We also applied a rotation of 45° in labelled images of size 2000 x 2000 pixels.

|                                                                                                            |                                                                                                          |                                                                                                             |                                                                                                   |
|------------------------------------------------------------------------------------------------------------|----------------------------------------------------------------------------------------------------------|-------------------------------------------------------------------------------------------------------------|---------------------------------------------------------------------------------------------------|
|                                                                                                            |                                                                                                          |                                                                                                             |                                                                                                   |
| Industrial oil palm with closed-canopy curvy terrain. <a href="#">Sumatra</a> . Detected                   | Industrial oil palm with closed-canopy on flat surface. <a href="#">Sao Tome</a> . Detected              | Industrial oil palm with closed-canopy on flat surface. <a href="#">Venezuela</a> . Detected                | Industrial oil palm with closed-canopy on flat surface. <a href="#">Kalimantan</a> . Detected     |
|                                                                                                            |                                                                                                          |                                                                                                             |                                                                                                   |
| Smallholder oil palm with closed-canopy on curvy terrain. <a href="#">Sumatra</a> . Detected               | closed-canopy smallholder oil palm. <a href="#">Tanzania</a> on flat surface. Detected                   | Smallholder oil palm with open canopy (young >3yrs old) on flat surface. <a href="#">Sumatra</a> . Detected | Smallholder oil palm with open canopy on flat surface. <a href="#">Sumatra</a> . Detected         |
|                                                                                                            |                                                                                                          |                                                                                                             |                                                                                                   |
| Industrial oil palm mixed with large forest trees on flat surface <a href="#">DRC</a> . Partially detected | Industrial oil palm, heterogenous stand on flat surface. <a href="#">Sumatra</a> . Not detected          | Industrial oil palm with open canopy (<3yrs) on flat surface. <a href="#">Kalimantan</a> . Not detected     | Area cleared for industrial oil palm, but plantation failed. <a href="#">Papua</a> . Not detected |
|                                                                                                            |                                                                                                          |                                                                                                             |                                                                                                   |
| Scattered Smallholder oil palm. <a href="#">Benin</a> on flat surface Not detected                         | Semi-wild smallholder oil palm mixed undergrowth on flat surface. <a href="#">Nigeria</a> . Not detected | Smallholder oil palm freshly planted on flat surface. <a href="#">Sumatra</a> . Not detected.               |                                                                                                   |

**Figure 4.** Examples of oil palm plantations around the world that have been detected or not detected by the model. One square is about 390m x 390 m = 15 ha.

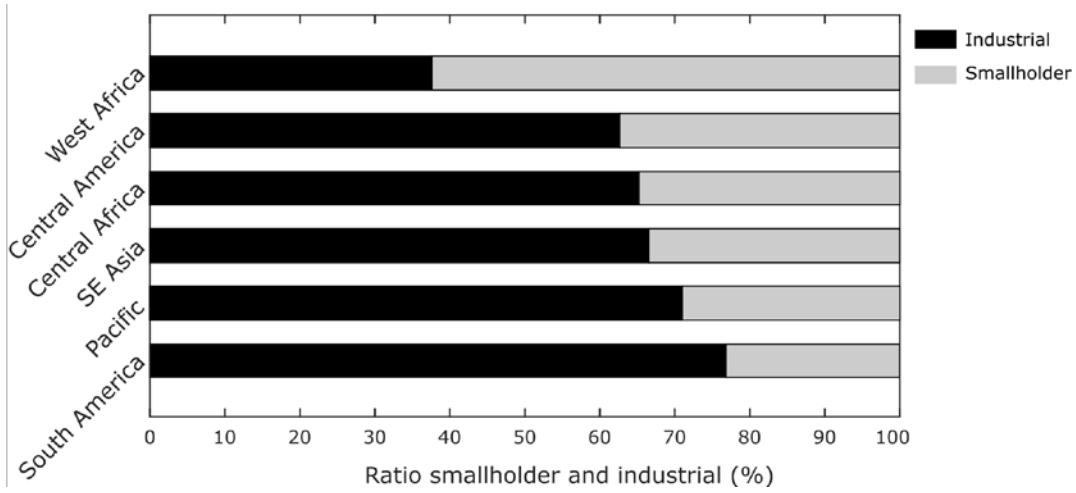

**Figure 5. Ratio smallholders and industrial at sub-continental scale. The ratio was obtained with the global oil palm layer for the second half year of 2019.**

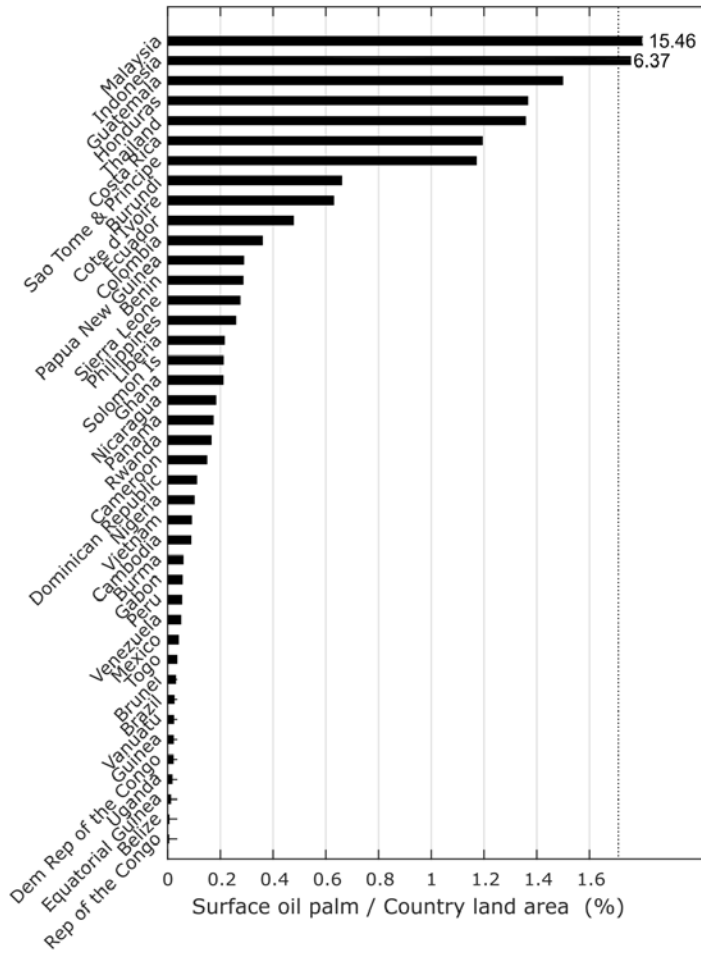

**SFigure 6. Percentage of country land area dedicated to oil palm.**

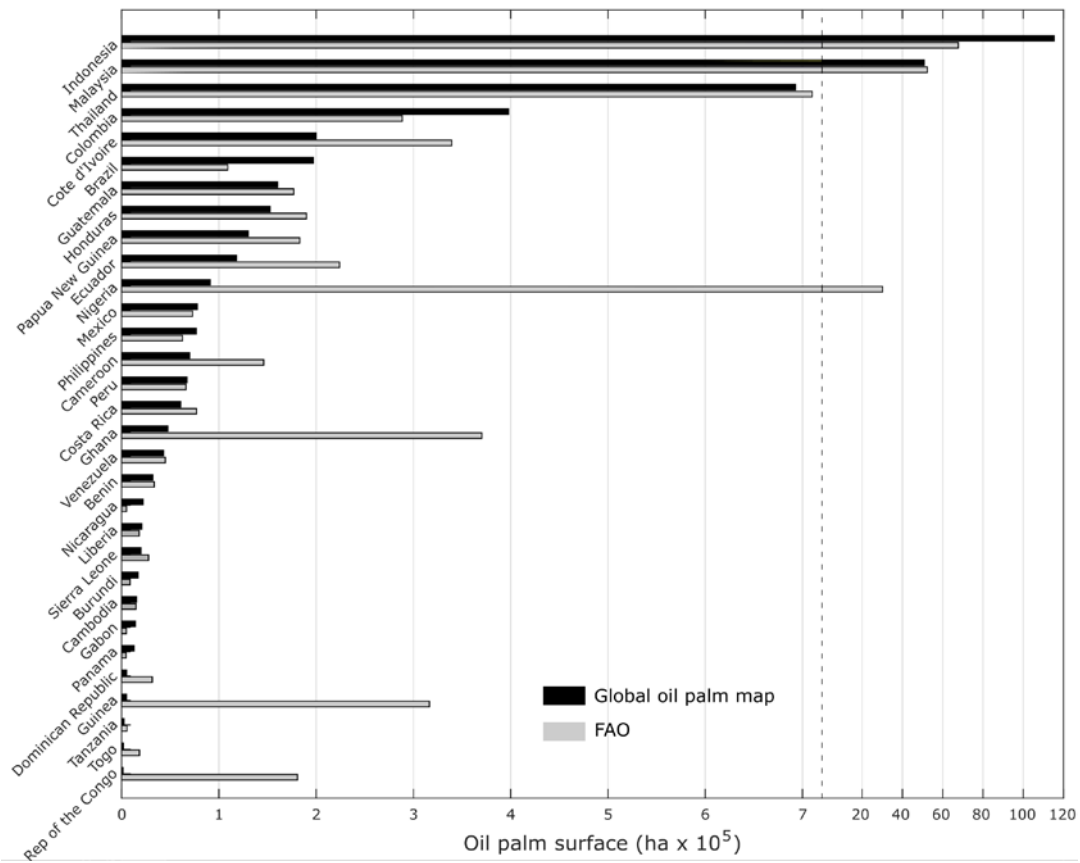

60 SFigure 7. Oil palm surface per country generated with the global oil palm layer (2019) and obtained from FAOSTAT 'harvested area' year 2018.



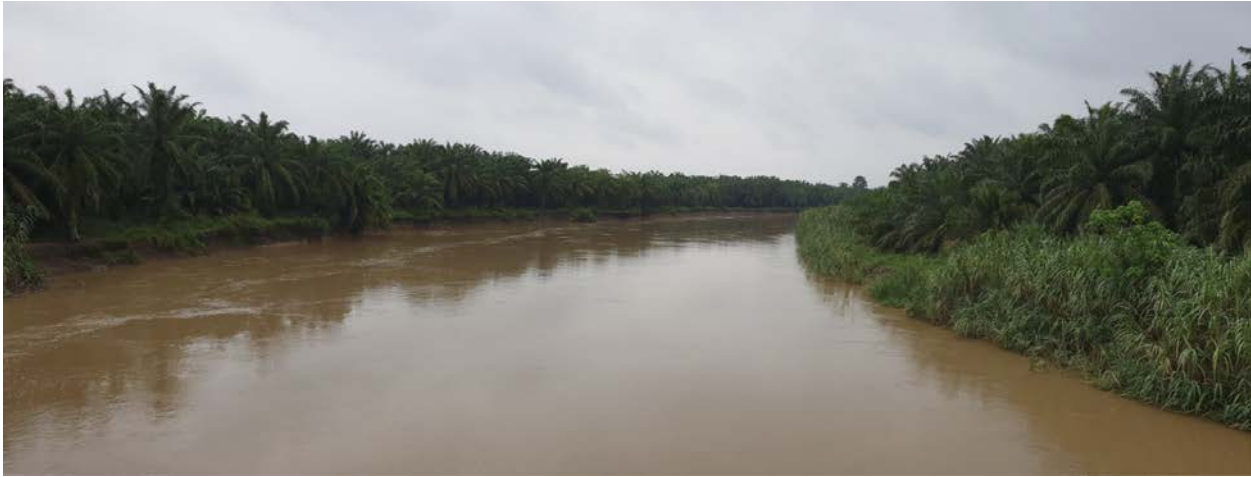

65

**Figure 8. Smallholder oil palm planted right up to the river edge in Sumatra. These large areas of industrial-scale oil palm plantings are operated under smallholder licenses, potentially making it easier to bypass environmental legislation to prohibit planting of oil palm to within 50 m of river banks.**

70
