# Supplementary material for: High-resolution global map of smallholder and industrial closed-canopy oil palm plantations
Source: Copernicus journal article supplement (doi:10.5194/essd-2020-159), 2020-08-24
Supplement: Supplementary file [file essd-2020-159-AC3-supplement.pdf]

## REVIEWER #1

This paper presents an up-to-date map of oil palm plantations by typology (industrial vs. smallholder plantations) at the global scale and with unprecedented detail (10-meter resolution) for the year 2019, and showed the suitability of deep learning in remote sensing for complex classification scenarios in which contextual information may be useful. It is supported by the knowledge available in the literature. The results showed that the method proposed is robust and repeatable. The paper is clearly described and the comparison with previous works showed better results.

L.38- as new imagery is published, it can be used to reliably to monitor the — as new

images become available, it can be used to monitor the

L.123- with green signify — with green signify

L.126- spectral images — optical images

L.126- satellites, both — satellites, respectively, both

L.187- This study employed the — This study employed the

L.384 -and FOA harvested — and FAO harvested

Dear Reviewer #1,

Thank you for your review. We appreciate your supporting words on the importance and quality of the global oil palm plantations dataset.

We updated the manuscript based on your comments and recommendations.

L39 - ...as new images become available, they can be used to monitor the...

L145 - ...with green signify....

L147 - ...optical images....

L148 - ...satellites, respectively, both...

L217 - This study employed the...

L456 - ...and FAO harvested....
